# Supplementary material for: Defining an Optimal Range of Centrifugation Parameters for Canine Semen Processing
Source: MDPI journal article supplement (doi:10.3390/ani13081421), 2023-04-21
Supplement: s1 [file s1]

## Supplementary Tables:

**Table S1:** Change in morphologic defects of spermatozoa (%) from baseline (T0 for initial raw semen evaluation) over time by centrifugation treatment groups. Treatment groups labelled as A: 400 g 5 min, B: 720 g 5 min, C: 900 g 5 min, D: 400 g 10 min, E: 720 g 10 min, F: 900 g 10 min. Time points T1: post-centrifugation, T2: 24 h of cooling, T3: 48 h of cooling. Different superscript letters (a, b, c) denote statistically significant ( $p < 0.05$ ) differences between time points for a given treatment group per sperm parameter. Black triangles (▲) or asterisks (\*) denote statistically significant ( $p < 0.05$ ) difference between treatment groups within a given time point. Absence of markings within a row or column means no significant difference.

| Treatment groups | Percentage change from baseline for acrosome abnormalities (median $\pm$ SEM) |                               |                               | Percentage change from baseline for head abnormalities (median $\pm$ SEM) |                                |                               | Percentage change from baseline for midpiece abnormalities (median $\pm$ SEM) |                                |                                | Percentage change from baseline for tail abnormalities (median $\pm$ SEM) |                                |                  |
|------------------|-------------------------------------------------------------------------------|-------------------------------|-------------------------------|---------------------------------------------------------------------------|--------------------------------|-------------------------------|-------------------------------------------------------------------------------|--------------------------------|--------------------------------|---------------------------------------------------------------------------|--------------------------------|------------------|
|                  | T1                                                                            | T2                            | T3                            | T1                                                                        | T2                             | T3                            | T1                                                                            | T2                             | T3                             | T1                                                                        | T2                             | T3               |
| A                | 2.5 $\pm$ 1.31 <sup>a</sup>                                                   | 9.50 $\pm$ 2.12 <sup>b</sup>  | 19.0 $\pm$ 2.27 <sup>c</sup>  | 1.75 $\pm$ 2.19                                                           | 6.0 $\pm$ 2.51                 | 9.50 $\pm$ 2.21               | 1.25 $\pm$ 2.67 <sup>a</sup>                                                  | 1.75 $\pm$ 2.62 <sup>a,b</sup> | -3.25 $\pm$ 1.73 <sup>b</sup>  | -2.25 $\pm$ 1.38                                                          | -1.0 $\pm$ 1.14 <sup>▲</sup>   | -2.75 $\pm$ 1.73 |
| B                | 2.25 $\pm$ 1.36 <sup>a</sup>                                                  | 14.0 $\pm$ 1.75 <sup>b</sup>  | 19.25 $\pm$ 2.36 <sup>c</sup> | 6.75 $\pm$ 2.30 <sup>a</sup>                                              | 9.25 $\pm$ 2.28 <sup>a,b</sup> | 11.75 $\pm$ 1.66 <sup>b</sup> | -2.50 $\pm$ 2.51                                                              | -1.75 $\pm$ 2.79               | -3.25 $\pm$ 1.62               | -2.75 $\pm$ 1.13                                                          | 0 $\pm$ 1.68                   | -1.25 $\pm$ 1.51 |
| C                | 3.75 $\pm$ 1.42 <sup>a</sup>                                                  | 14.0 $\pm$ 1.80 <sup>b</sup>  | 17.75 $\pm$ 2.51 <sup>b</sup> | 4.75 $\pm$ 2.18                                                           | 9.25 $\pm$ 2.36                | 6.25 $\pm$ 2.32               | 0.25 $\pm$ 0.96 <sup>a,b</sup>                                                | -0.75 $\pm$ 2.53 <sup>a</sup>  | -4.50 $\pm$ 1.56 <sup>b</sup>  | -1.50 $\pm$ 1.53                                                          | -4.0 $\pm$ 0.62 <sup>▲,*</sup> | -1.25 $\pm$ 1.78 |
| D                | 4.25 $\pm$ 1.34 <sup>a</sup>                                                  | 14.75 $\pm$ 2.50 <sup>b</sup> | 20.50 $\pm$ 2.27 <sup>b</sup> | 4.0 $\pm$ 1.60 <sup>a</sup>                                               | 8.50 $\pm$ 1.50 <sup>a,b</sup> | 8.0 $\pm$ 2.12 <sup>b</sup>   | -3.0 $\pm$ 2.43                                                               | -4.50 $\pm$ 2.44               | -2.75 $\pm$ 1.74 <sup>▲</sup>  | 1.0 $\pm$ 1.29                                                            | 0.75 $\pm$ 1.55                | -2.0 $\pm$ 1.49  |
| E                | 2.50 $\pm$ 1.54 <sup>a</sup>                                                  | 16.25 $\pm$ 2.27 <sup>b</sup> | 19.75 $\pm$ 2.70 <sup>b</sup> | 4.50 $\pm$ 1.68                                                           | 7.75 $\pm$ 1.68                | 10.75 $\pm$ 2.11              | -3.75 $\pm$ 1.98                                                              | -4.0 $\pm$ 2.88                | -3.50 $\pm$ 2.15               | 3.25 $\pm$ 0.95                                                           | -1.25 $\pm$ 1.02 <sup>*</sup>  | -2.50 $\pm$ 1.68 |
| F                | 1.50 $\pm$ 1.25 <sup>a</sup>                                                  | 15.0 $\pm$ 2.12 <sup>b</sup>  | 20.75 $\pm$ 2.03 <sup>b</sup> | 5.25 $\pm$ 2.07                                                           | 7.25 $\pm$ 3.10                | 8.0 $\pm$ 2.68                | -3.0 $\pm$ 2.52 <sup>a,b</sup>                                                | -1.25 $\pm$ 2.45 <sup>a</sup>  | -6.0 $\pm$ 1.38 <sup>b,▲</sup> | -0.50 $\pm$ 1.48                                                          | -3.0 $\pm$ 1.34                | -2.0 $\pm$ 1.90  |
